# Supplementary material
Source: publisher site journal article supplement (https://www.dovepress.com/article/470946)
Supplement: Supplementary file 1 [file get_supplementary_file.php]

**SUPPLEMENTARY APPENDIX**

**Title: Combined dacomitinib and selpercatinib treatment for a patient with**

***EGFR*-mutant non-small cell lung cancer and acquired *CCDC6-RET* fusion**

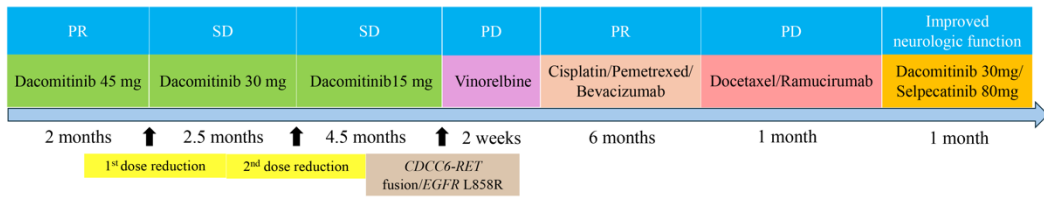

**Figure S1.** Management Timeline for NSCLC Patient with *EGFR* L858R Mutation and *CCDC6-RET* Fusion.

Table S1. The Gene List of the Next-Generation Sequencing Panel

| Gene         | SNV/InDel | Fusion | Gene         | SNV/InDel | Fusion | Gene          | SNV/InDel | Fusion |
|--------------|-----------|--------|--------------|-----------|--------|---------------|-----------|--------|
| <i>ALK</i>   | •         | •      | <i>MET</i>   | •         | •      | <i>NRG1</i>   |           | •      |
| <i>BRA</i>   | •         |        | <i>NTRK1</i> | •         | •      | <i>PIK3CA</i> | •         |        |
| <i>EGFR</i>  | •         |        | <i>NTRK2</i> | •         | •      | <i>ROS1</i>   | •         | •      |
| <i>ERBB2</i> | •         |        | <i>NTRK3</i> | •         | •      | <i>RET</i>    | •         | •      |
| <i>KRAS</i>  | •         |        |              |           |        |               |           |        |

**Abbreviations:** SNV, Single Nucleotide Variants, InDels, Insertions/Deletions
